# Supplementary material
Source: HighWire-hosted journal article supplement (https://www.annals.org/content/suppl/2008/05/05/0000605-200806170-00221)
Supplement: Lanzkron_AT2_148-12-DC1-A1.pdf [file Lanzkron_AT2_148-12-DC1-A1.pdf]

**Appendix Table 2. World Health Organization Collaborating Center for Drug Monitoring Criteria**

| <b>Criterion</b> →                                                     | <b>Causality</b> →                                | <b>Level of Evidence</b>                                                         |
|------------------------------------------------------------------------|---------------------------------------------------|----------------------------------------------------------------------------------|
| 1. Plausible time relationship between drug administration and event   | Certain: All 4 criteria are fulfilled             | Level 1: $\geq 1$ certain case report of toxicity                                |
| 2. Absence of a concurrent disease which may have caused the event     | Probable: Only criteria 1, 2, and 3 are fulfilled | Level 2: $\geq 1$ probable case report of toxicity, but no certain report        |
| 3. A reasonable response to drug withdrawal                            | Possible: Only criterion 1 is fulfilled           | Level 3: $\geq 1$ possible report of toxicity, but no certain or probable report |
| 4. Existence of a rechallenge or a demonstrated biological explanation | Unlikely: Criterion 1 is not fulfilled            | –                                                                                |
