# Supplementary material
Source: HighWire-hosted journal article supplement (https://www.annals.org/content/suppl/2008/05/05/0000605-200806170-00221)
Supplement: Lanzkron_AT3_148-12-DC1-A1.pdf [file Lanzkron_AT3_148-12-DC1-A1.pdf]

**Appendix Table 3. Adverse Events in Case Reports of Hydroxyurea for Sickle Cell Disease\***

| <b>Outcome</b>               | <b>Patients, <i>n</i></b> | <b>Men/Women, <i>n/n</i></b> | <b>Mean Age at Adverse Event, <i>y</i></b> | <b>Median Duration of HU Therapy until Adverse Event, <i>wk</i></b> | <b>Reports with Certain Causality, <i>n</i></b> | <b>Reports with Probable Causality, <i>n</i></b> | <b>Reports with Possible Causality, <i>n</i></b> | <b>Level of Evidence for This Outcome†</b> |
|------------------------------|---------------------------|------------------------------|--------------------------------------------|---------------------------------------------------------------------|-------------------------------------------------|--------------------------------------------------|--------------------------------------------------|--------------------------------------------|
| Leg ulcer                    | 1                         | 1/0                          | 45                                         | 104                                                                 | 0                                               | 0                                                | 1                                                | 3                                          |
| Leukemia                     | 3                         | 3/0                          | 32                                         | 288                                                                 | 0                                               | 0                                                | 3                                                | 3                                          |
| Cytopenia                    | 1                         | 1/0                          | 26                                         | 153                                                                 | 0                                               | 1                                                | 0                                                | 2                                          |
| Avascular necrosis           | 2                         | 2/0                          | 17                                         | NR                                                                  | 0                                               | 0                                                | 2                                                | 3                                          |
| Splenomegaly                 | 1                         | 1/0                          | 32                                         | NR                                                                  | 0                                               | 0                                                | 1                                                | 3                                          |
| Cryptosporidial infection    | 1                         | 1/0                          | 36                                         | 80                                                                  | 0                                               | 0                                                | 1                                                | 3                                          |
| Intracerebral hemorrhage     | 1                         | 0/1                          | 22                                         | 52                                                                  | 0                                               | 0                                                | 1                                                | 3                                          |
| Hodgkin lymphoma             | 1                         | 0/1                          | 8                                          | 24                                                                  | 0                                               | 0                                                | 1                                                | 3                                          |
| Low sperm count/low motility | 4                         | 0/4                          | 31                                         | 128                                                                 | 0                                               | 0                                                | 4                                                | 3                                          |
| Acute myocardial infarction  | 1                         | 0/1                          | 28                                         | NR                                                                  | 0                                               | 0                                                | 1                                                | 3                                          |
| Skin hyperpigmentation       | 2                         | 1/1                          | 16                                         | 75                                                                  | 0                                               | 0                                                | 2                                                | 3                                          |

\*HU = hydroxyurea; NR = not reported.

†In the World Health Organization causality assessment, level 1 is the highest level of evidence, based on  $\geq 1$  case report with certain causality (**Appendix Table 2**).
